# Supplementary material for: Synthesis and Characterization of a Novel Biocompatible Alloy, Ti-Nb-Zr-Ta-Sn
Source: MDPI journal article supplement (doi:10.3390/ijms221910611), 2021-09-30
Supplement: s1 [file s1]

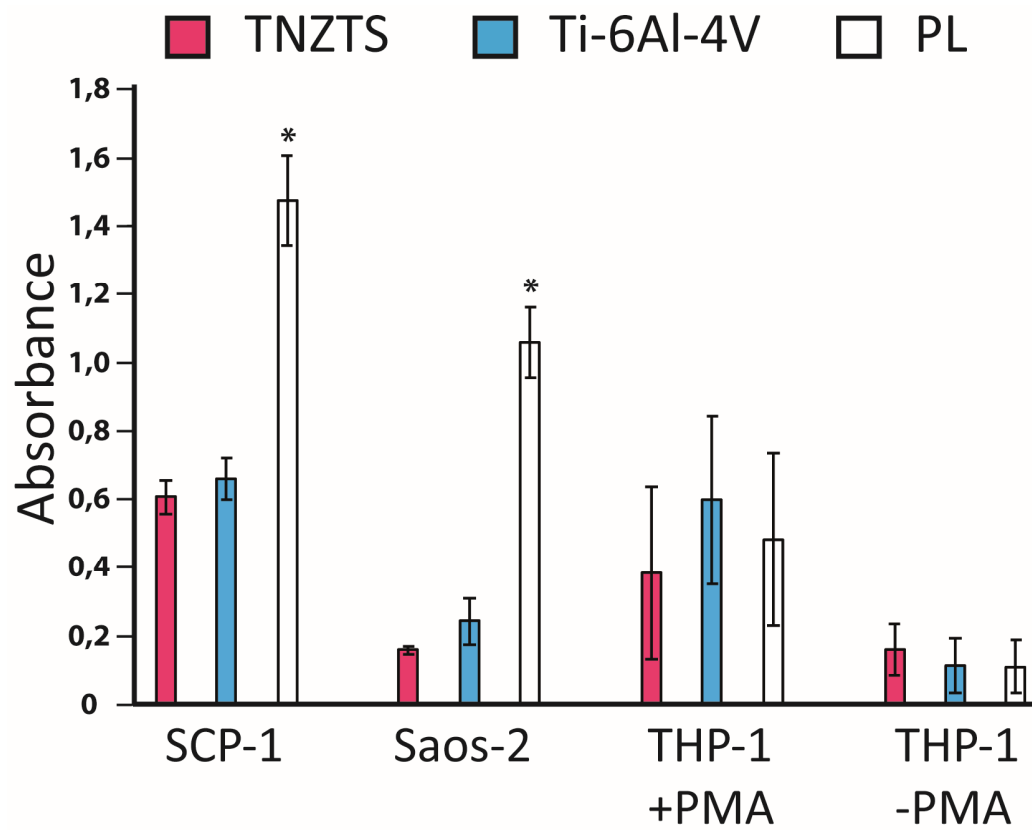

**Figure S1:** SRB absorbance indicating protein content which is indirect measurement of cell proliferation. SRB measurements were conducted for SCP-1, Saos-2, THP-1 (with and without PMA inducer) cultured on TNZTS, Ti-6Al-4V and cell culture plate plastic (PL) for 24 h. \* for  $p < 0.1$ .

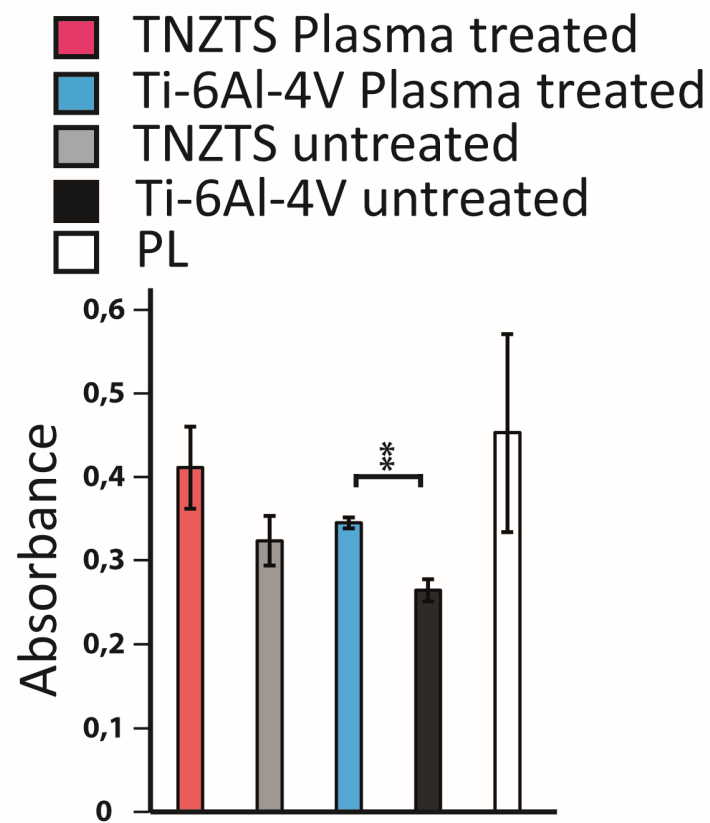

**Figure S2:** SRB absorbance indicating protein content which is indirect measurement of cell proliferation. SRB measurements were conducted for primary human osteoblasts cultured on untreated and oxygen plasma treated metallic substrates (Ti-6Al-4V and TNZTS) and control (cell culture plate plastic) for 24 h. \*\* for  $p < 0.05$ .
